# Supplementary material for: Measuring well-being: Creating a taxonomy and item bank for positive mental health
Source: Research Square preprint supplement (doi:10.21203/rs.3.rs-6862291/v1), 2025-06-18
Supplement: Supplementary file 1 [file c501b9e010970efd36c62110.docx]

**Supplementary Materials**

**Table S1**

*List of Dimensions and Subdimensions Identified for Item Sorting (Presented in Alphabetical Order)*

| Dimension | Definition | Subdimension |
| --- | --- | --- |
| Activities and functioning | Behaviour and activities that characterize daily life. This involves the specific activities we fill our time with, and our ability to undertake these tasks (Linton et al., 2016). | Daily activities (DA)  Leisure (L)  Physical Ability (PA)    *Note:* items related to specific behaviors associated with disability were removed |
| Autonomy | The perception that we have ownership over our behavior and choices (Ryan & Deci, 2000). | Control over decisions/behaviors (CODB)  Expression of Self (EOS) |
| Avoidance coping | Any behavioral, cognitive, or emotional strategy for managing a stressful event or situation in which a person does not address the problem directly but instead disengages from the situation and averts attention from it (American Psychological Association, 2022a). | Denial (DEN)  Distraction (DIS)  Waiting (WAI)  Withdrawal (WIT) |
| Calmness | States characterized by low-arousal pleasant feelings, like serenity and peacefulness (Longo et al., 2017). | Inner peace (IP) |
| Competence | Feeling and perceiving oneself as effective and able to overcome challenges, stressors and adversity, and achieve desired outcomes; feeling resilient (Longo et al., 2017). | Adaptability (AD)  Goal achievement (GA)  Perseverance (PER)  Problem solving (PS) |
| Development | Experiencing continuous growth and improvement (Longo et al., 2017). | Growth (GRO) |
| Emotion-focused coping | A stress-management strategy in which a person focuses on regulating his or her negative emotional reactions to a stressor (American Psychological Association, 2022b). | Acceptance (AC)  Emotion regulation (ER)  Humor (HU)  Meaning making (MM)  Support (SUP) |
| Engagement | Combination of Longo et al. (2017) Involvement (Having an absorbing experience in which the individual is completely focused on the task at hand; the flow state) and Self-awareness (consists in knowing oneself and experiencing a state of mindful awareness). | Absorption (AB) |
| Happiness | States that are characterized by moderate-arousal pleasant feelings, such as feeling happy, cheerful and pleased (Longo et al., 2017). | Happy (HAP) |
| Life Satisfaction | The degree to which a person positively evaluates the overall quality of his/her life as a whole. In other words, how much the person likes the life he/she leads (Veenhoven, 1996). | Life satisfaction (LS) |
| Meaning and Purpose | Combination of Longo et al. (2017) purpose (Having clear goals, a sense of direction and a larger aim in life) and significance (The feeling that what we do is worthwhile, rewarding and valuable). | Direction (DIR)  Meaning (MEA) |
| Optimism | Having a positive outlook on and expectations about the future (Longo et al., 2017). | Future (FUT)  Outlook (OUT) |
| Personal Circumstances | These dimensions are related to the conditions and external pressures that an individual faces. This involves numerous environmental and socioeconomic concerns such as financial security (Linton et al., 2016). | General standard of living (GSL)    *Note*: List of very specific circumstances were removed (i.e., transport, repayments, family responsibilities) |
| Personal Relationships | Involves a feeling of belonging, mutual caring, love, and closeness to friends, family and loved ones; positive relationships (Longo et al., 2017). | Belonging (BEL)  Feeling valued (FV)  Getting along (GA)  Giving support (GS)  Relationship Satisfaction (RELS)  Receiving support (RSUP) |
| Physical health | The quality and performance of bodily functioning. This includes having the capacity to sense the external environment and our experiences of pain and comfort (Linton et al., 2016). | General health (GH)  Restriction (RES)    *Note:* List of specific symptoms and health/risk behaviors removed |
| Problem-focused coping | A stress-management strategy in which a person directly confronts a stressor in an attempt to decrease or eliminate it (American Psychological Association, 2022c). | Analysis (AN)  Timing (TIM) |
| Self-acceptance | Combination of Longo et al. (2017) Self-acceptance (Experiencing different aspects of oneself [e.g., one's past, personality, thoughts, and feelings] in a tolerant, receptive and non-judgmental way) and self-worth (Holding positive evaluations and feelings about oneself). | Body Image (BO)  Other perception (OP)  Self-worth (SW) |
| Self-congruence | The perception that our actions and behaviors are compatible with our interests, values, and beliefs (Longo et al., 2017). | Alignment (ALI) |
| Sense of community | A sense of belonging to a community and making a contribution to wider society; social wellbeing (Keyes, 1998). | Community Belonging (CB)  Community Contribution (CC)  Views on society (VOS)  Views on people (VOP) |
| Spirituality | Spirituality is concerned with meaning, a connection to something greater than oneself and in some cases faith in a higher power (Linton et al., 2016). | Environment (ENV)  God Relationship (GRE)  Impact of Religion (IOR)  Presence (PRE)    *Note:* items related to specific spiritual practices were removed |
| Vitality | States characterized by high-arousal pleasant feelings, such as feeling energetic and lively (Longo et al., 2017). | Energy (EN)  Note: items related to physical energy were reallocated to Physical health |
| Uncategorized (items that did not fit under above dimensions, and were themed into the following subdimensions) |  | Control over life (COL)  Achievement (ACH)  Fun (FUN)  Curiosity (CUR)  Other focus (OF) |

**T*able S2***

*Inter-dimension Correlations of the 26-factor Model Estimated Using Exploratory Structural Equation Modelling.*

|  | 2 | 3 | 4 | 5 | 6 | 7 | 8 | 9 | 10 | 11 | 12 | 13 | 14 | 15 | 16 | 17 | 18 | 19 | 20 | 21 | 22 | 23 | 24 | 25 | 26 |
| --- | --- | --- | --- | --- | --- | --- | --- | --- | --- | --- | --- | --- | --- | --- | --- | --- | --- | --- | --- | --- | --- | --- | --- | --- | --- |
| 1. Activities and functioning | 0.477* | 0.442* | 0.559* | 0.237* | 0.12 | 0.338* | 0.123 | 0.472* | 0.431* | 0.314* | 0.483* | 0.404* | 0.524* | 0.355* | 0.192* | 0.303* | 0.086 | 0.102 | 0.216* | -0.046 | 0.209* | 0.484* | 0.342* | 0.406* | -0.171* |
| 2. Autonomy | 1 | 0.449* | 0.61* | 0.219* | 0.088 | 0.35* | 0.124* | 0.486* | 0.481* | 0.33* | 0.537* | 0.282* | 0.602* | 0.428* | 0.181* | 0.365* | 0.074 | 0.153* | 0.189* | 0.02 | 0.13* | 0.326* | 0.326* | 0.472* | -0.198* |
| 3. Calmness |  | 1 | 0.453* | 0.03 | 0.083 | 0.383* | 0.111 | 0.419* | 0.486* | 0.474* | 0.384* | 0.376* | 0.511* | 0.428* | 0.115* | 0.297* | 0.07 | 0.129* | 0.136* | 0.001 | -0.044 | 0.32* | 0.2* | 0.35* | -0.161* |
| 4. Competence |  |  | 1 | 0.348* | 0.175* | 0.422* | 0.161* | 0.547* | 0.565* | 0.299* | 0.548* | 0.374* | 0.643* | 0.459* | 0.164* | 0.409* | 0.144* | 0.087 | 0.231* | 0.059 | 0.215* | 0.467* | 0.457* | 0.552* | -0.219* |
| 5. Development |  |  |  | 1 | 0.014 | 0.184* | 0.178* | 0.248* | 0.233* | 0.003 | 0.279* | 0.128* | 0.258* | 0.321* | 0.18* | 0.276* | 0.07 | -0.033 | 0.21* | 0.146* | 0.228* | 0.087 | 0.304* | 0.391* | 0.072 |
| 6. Engagement |  |  |  |  | 1 | 0.153* | -0.067 | 0.062 | 0.129* | 0.039 | 0.007 | 0.029 | 0.129* | -0.005 | -0.04 | 0.036 | 0.115* | -0.043 | 0.086 | 0.006 | 0.09 | 0.131* | 0.093 | 0.06 | -0.03 |
| 7. Happiness |  |  |  |  |  | 1 | 0.128 | 0.38* | 0.482* | 0.274* | 0.42* | 0.229* | 0.457* | 0.411* | 0.105 | 0.318* | 0.105 | 0.102 | 0.155* | 0.161* | 0.101 | 0.231* | 0.198* | 0.374* | -0.063 |
| 8. Life Satisfaction |  |  |  |  |  |  | 1 | 0.211* | 0.209* | 0.192* | 0.121 | 0.127* | 0.162* | 0.187* | 0.045 | 0.153* | 0.01 | 0.008 | 0.071 | 0.077 | -0.011 | 0.082 | 0.114 | 0.164* | -0.015 |
| 9. Meaning and Purpose |  |  |  |  |  |  |  | 1 | 0.608* | 0.372* | 0.468* | 0.308* | 0.57* | 0.471* | 0.128* | 0.478* | 0.031 | 0.223* | 0.156* | 0.082 | 0.019 | 0.374* | 0.253* | 0.4* | -0.16* |
| 10. Optimism |  |  |  |  |  |  |  |  | 1 | 0.35* | 0.451* | 0.384* | 0.611* | 0.531* | 0.075 | 0.433* | 0.018 | 0.195* | 0.183* | 0.095* | 0.085 | 0.383* | 0.299* | 0.492* | -0.119* |
| 11. Personal circumstances |  |  |  |  |  |  |  |  |  | 1 | 0.297* | 0.291* | 0.38* | 0.366* | 0.038 | 0.192* | 0.073 | 0.142* | 0.049 | 0.006 | -0.081 | 0.22* | 0.12 | 0.248* | -0.106 |
| 12. Personal relationships |  |  |  |  |  |  |  |  |  |  | 1 | 0.243* | 0.626* | 0.561* | 0.227* | 0.387* | -0.026 | 0.207* | 0.26* | 0.02 | 0.236* | 0.269* | 0.348* | 0.535* | -0.159* |
| 13. Physical health |  |  |  |  |  |  |  |  |  |  |  | 1 | 0.444* | 0.335* | 0.082 | 0.169* | 0.039 | 0.065 | 0.063 | 0.075 | 0.019 | 0.495* | 0.141* | 0.28* | -0.088 |
| 14. Self-acceptance |  |  |  |  |  |  |  |  |  |  |  |  | 1 | 0.579* | 0.175* | 0.463* | 0.079 | 0.148* | 0.203* | 0.1* | 0.129* | 0.419* | 0.362* | 0.521* | -0.166* |
| 15. Sense of Control |  |  |  |  |  |  |  |  |  |  |  |  |  | 1 | 0.207* | 0.45* | -0.003 | 0.163* | 0.14* | 0.277* | 0.079 | 0.248* | 0.3* | 0.536* | 0.006 |
| 16. Self-congruence |  |  |  |  |  |  |  |  |  |  |  |  |  |  | 1 | 0.099* | -0.003 | -0.044 | 0.117* | 0.038 | 0.075 | 0.038 | 0.057 | 0.151* | -0.021 |
| 17. Spirituality |  |  |  |  |  |  |  |  |  |  |  |  |  |  |  | 1 | -0.003 | 0.082 | 0.074 | 0.139* | 0.098* | 0.214* | 0.319* | 0.471* | 0.028 |
| 18. Control over life |  |  |  |  |  |  |  |  |  |  |  |  |  |  |  |  | 1 | -0.101* | 0.028 | -0.071 | 0.119* | 0.035 | 0.155* | 0.097 | 0.064 |
| 29. Achievement |  |  |  |  |  |  |  |  |  |  |  |  |  |  |  |  |  | 1 | -0.015 | 0.061 | -0.032 | 0.107 | 0.034 | 0.134* | -0.046 |
| 20. Fun |  |  |  |  |  |  |  |  |  |  |  |  |  |  |  |  |  |  | 1 | 0.032 | 0.134* | 0.109* | 0.109* | 0.219* | -0.102* |
| 21. Curiosity |  |  |  |  |  |  |  |  |  |  |  |  |  |  |  |  |  |  |  | 1 | -0.048 | 0.001 | 0.063 | 0.176* | 0.162* |
| 22. Other views |  |  |  |  |  |  |  |  |  |  |  |  |  |  |  |  |  |  |  |  | 1 | 0.074 | 0.268* | 0.244* | 0.02 |
| 23. Vitality |  |  |  |  |  |  |  |  |  |  |  |  |  |  |  |  |  |  |  |  |  | 1 | 0.171* | 0.253* | -0.185* |
| 24. Problem-focused coping |  |  |  |  |  |  |  |  |  |  |  |  |  |  |  |  |  |  |  |  |  |  | 1 | 0.6* | 0.096 |
| 25. Emotion-focused coping |  |  |  |  |  |  |  |  |  |  |  |  |  |  |  |  |  |  |  |  |  |  |  | 1 | 0.11 |
| 26. Avoidant coping |  |  |  |  |  |  |  |  |  |  |  |  |  |  |  |  |  |  |  |  |  |  |  |  | 1 |

Note: * = significant at p<.001

**Table S3**

Results of Item Response Theory Analysis, indicating discrimination and difficulty for locally independent items.

Note: Items without discrimination or difficulty statistics were found to be locally dependent.

|  |  | Slope | Difficulty parameters | | | | | |
| --- | --- | --- | --- | --- | --- | --- | --- | --- |
|  | Item | (discrimination) | 1 | 2 | 3 | 4 | 5 | 6 |
|  |  |  |  |  |  |  |  |  |
| **Activities and Functioning** | |  |  |  |  |  |  |  |
|  | *Interest in activities and leisure (combined)* |  |  |  |  |  |  |  |
|  | The things I usually do were as interesting to me as they ever were | - |  |  |  |  |  |  |
|  | I kept interested in things | 3.675 | 7.359 | 5.14 | 3.794 | 1.824 | -0.135 | -3.431 |
|  | I really looked forward to my daily activities | 3.36 | 5.792 | 4.01 | 2.78 | 0.952 | -0.901 | -3.836 |
|  | I was able to perform my usual activities (e.g. employment, studying, housework, free- time activities) without difficulty | 2.303 | 4.673 | 3.255 | 2.395 | 1.407 | -0.068 | -2.397 |
|  | I enjoyed my free time | 3.58 | 7.184 | 5.418 | 4.233 | 2.626 | 0.377 | -2.692 |
|  | I had the opportunity for leisure activities | 2.557 | 5.112 | 3.689 | 2.843 | 1.623 | -0.127 | -2.554 |
|  | I was satisfied with the way I spent my spare time | 3.664 | 6.713 | 4.762 | 3.22 | 1.565 | -0.532 | -3.816 |
|  | I was satisfied with my ability to manage my hobbies or recreational activities | 3.774 | 6.75 | 5.171 | 3.669 | 1.614 | -0.631 | -3.746 |
|  |  |  |  |  |  |  |  |  |
|  | Physical ability |  |  |  |  |  |  |  |
|  | I needed help with jobs around my place of residence (e.g. preparing food, cleaning, gardening) | - |  |  |  |  |  |  |
|  | I was able to look after myself | 2.957 | 6.885 | 5.486 | 4.47 | 2.949 | 1.115 | -1.964 |
|  | I could rely on myself to be ready for what I needed to do each day | 3.47 | 6.98 | 5.552 | 4.203 | 2.538 | 0.092 | -3.358 |
|  | I was satisfied with my ability to move around | 3.096 | 5.843 | 4.443 | 3.616 | 2.352 | 0.435 | -2.516 |
|  |  |  |  |  |  |  |  |  |
| **Avoidant coping** | |  |  |  |  |  |  |  |
|  | Denial |  |  |  |  |  |  |  |
|  | I pretended that it hasn't really happened | - |  |  |  |  |  |  |
|  | I tried to ignore or avoid the problem | - |  |  |  |  |  |  |
|  | I avoided even thinking about my problems | 3.301 | 3.936 | 1.888 | 0.264 | -1.453 | -2.879 | -4.984 |
|  | I tried to deny how serious the problem really was | 2.739 | 3.53 | 1.45 | 0.325 | -1.315 | -2.686 | -4.519 |
|  | I sat tight and hoped it all goes away | 2.879 | 3.799 | 1.829 | 0.567 | -1.083 | -2.77 | -4.419 |
|  | I put off facing the problem | - |  |  |  |  |  |  |
|  | I avoided dealing with the problem; things like this often go away on their own | - |  |  |  |  |  |  |
|  |  |  |  |  |  |  |  |  |
|  |  |  |  |  |  |  |  |  |
|  | Distraction |  |  |  |  |  |  |  |
|  | I tried to think about or do something else | 2.924 | 4.902 | 3.158 | 2.056 | -0.036 | -2.147 | -4.465 |
|  | I tried to distract myself from the problem | 2.491 | 4.271 | 2.441 | 1.374 | -0.175 | -1.808 | -3.939 |
|  | I turned to work or other substitute activities to take my mind off things | 2.177 | 3.626 | 2.183 | 1.183 | -0.182 | -1.664 | -3.632 |
|  | I directed my thoughts towards other matters | 2.381 | 4.484 | 2.701 | 1.723 | -0.285 | -1.932 | -4.281 |
|  | I let time take care of the problem | 1.941 | 3.605 | 2.024 | 1.135 | -0.419 | -2.013 | -4.029 |
|  |  |  |  |  |  |  |  |  |
|  | Withdrawal |  |  |  |  |  |  |  |
|  | I avoided being with people | 3.34 | 4.008 | 1.822 | 0.457 | -1.158 | -2.732 | -4.61 |
|  | I spent more time than usual alone | 2.361 | 3.447 | 1.683 | 0.781 | -0.694 | -2.008 | -3.764 |
|  | I withdrew socially | 3.948 | 4.375 | 1.886 | 0.381 | -1.594 | -3.182 | -5.327 |
|  | I became lonely or isolated | - |  |  |  |  |  |  |
|  |  |  |  |  |  |  |  |  |
| **Autonomy** | |  |  |  |  |  |  |  |
|  | Control over life |  |  |  |  |  |  |  |
|  | I was in control of my own life | 5.382 | 8.688 | 6.707 | 4.965 | 2.508 | -0.38 | -4.958 |
|  | In general, I felt I was in charge of the situation in which I live | - |  |  |  |  |  |  |
|  | I felt able to live my life the way I wanted | 3.29 | 5.225 | 3.788 | 2.501 | 1.087 | -0.772 | -3.944 |
|  | How things went in my life depended on my own actions | 2.189 | 4.999 | 4.176 | 3.146 | 1.544 | -0.237 | -2.632 |
|  |  |  |  |  |  |  |  |  |
|  | Expression of self |  |  |  |  |  |  |  |
|  | I generally felt free to express my ideas and opinions | - |  |  |  |  |  |  |
|  | I was not afraid to voice my opinions, even when they were in opposition to the opinions of most people | 3.488 | 6.798 | 5.119 | 3.481 | 1.346 | -0.768 | -3.685 |
|  | When I needed to stand up for myself I did it quite easily | 3.18 | 6.245 | 4.804 | 3.377 | 1.742 | -0.496 | -3.191 |
|  | I was confident to think or express my own ideas and opinions | 3.563 | 6.885 | 5.689 | 4.225 | 2.136 | -0.173 | -3.577 |
|  |  |  |  |  |  |  |  |  |
| **Calmness** | |  |  |  |  |  |  |  |
|  | I felt peaceful | - |  |  |  |  |  |  |
|  | I felt a sense of harmony in my life | 3.235 | 5.689 | 3.814 | 2.259 | 0.46 | -1.285 | -4.227 |
|  | I felt calm | 22.848 | 37.129 | 26.533 | 17.723 | 7.055 | -4.781 | -24.687 |
|  | I felt relaxed | - |  |  |  |  |  |  |
|  |  |  |  |  |  |  |  |  |
| **Competence** | |  |  |  |  |  |  |  |
|  | I tended to bounce back quickly after hard times | 2.77 | 5.775 | 3.946 | 2.785 | 1.055 | -0.839 | -3.534 |
|  | I could usually handle whatever comes my way | 3.249 | 6.778 | 5.044 | 3.713 | 1.873 | -0.697 | -3.855 |
|  | I could easily adjust in a difficult situation | - |  |  |  |  |  |  |
|  | I could cope well with unexpected problems | - |  |  |  |  |  |  |
|  | I met the goals that I set for myself | 3.252 | 6.047 | 4.012 | 2.796 | 0.86 | -1.09 | -4.162 |
|  | I worked hard to achieve my goals | 2.471 | 5.919 | 4.295 | 3.294 | 1.517 | -0.152 | -2.664 |
|  | I followed through on plans to achieve my goals | 3.243 | 6.522 | 4.628 | 3.263 | 1.195 | -0.889 | -4.097 |
|  | I knew how to reach my goals | 3.597 | 6.725 | 4.96 | 3.543 | 1.164 | -1.071 | -4.311 |
|  | I was not easily discouraged | - |  |  |  |  |  |  |
|  | I was able to persevere | 2.784 | 6.458 | 4.717 | 3.545 | 1.652 | -0.361 | -2.965 |
|  | Difficulties and hardship rarely stopped me | - |  |  |  |  |  |  |
|  | I viewed obstacles as challenges to overcome | - |  |  |  |  |  |  |
|  | I was able to solve my own problems | 3.195 | 7.021 | 5.087 | 3.913 | 2.027 | -0.361 | -3.436 |
|  | When in trouble, I could usually think of a solution | 3.108 | 6.882 | 4.903 | 3.797 | 1.831 | -0.592 | -3.893 |
|  | I felt there were lots of ways around any problem | 2.846 | 5.915 | 4.104 | 2.874 | 0.949 | -1.006 | -3.81 |
|  | I have been dealing with problems well | - |  |  |  |  |  |  |
|  |  |  |  |  |  |  |  |  |
| **Development** | |  |  |  |  |  |  |  |
|  | I had the sense that I have developed a lot as a person over time | 2.368 | 5.367 | 3.925 | 3.049 | 1.356 | -0.432 | -2.652 |
|  | I sought opportunities to learn new things | 3.414 | 6.852 | 5.065 | 3.631 | 1.48 | -0.693 | -3.734 |
|  | I sought out situations that challenge my skills and abilities | - |  |  |  |  |  |  |
|  | I welcomed changes in my life as chances to grow | 3.312 | 6.546 | 4.982 | 3.445 | 1.207 | -1.053 | -3.817 |
|  |  |  |  |  |  |  |  |  |
| **Emotion-focused** | |  |  |  |  |  |  |  |
|  | *Acceptance and Emotional Regulation* |  |  |  |  |  |  |  |
|  | I accepted that this has happened and that it cannot be changed | - |  |  |  |  |  |  |
|  | I accepted the reality of the fact that it happened | 2.754 | 5.679 | 4.855 | 4.03 | 1.787 | -0.308 | -3.094 |
|  | I learnt to live with it | - |  |  |  |  |  |  |
|  | I realised that I had no control over the problem | 1.441 | 3.942 | 2.97 | 2.221 | 0.685 | -0.587 | -2.381 |
|  | I did something to make me feel better | 2.03 | 4.732 | 3.879 | 2.953 | 1.265 | -0.439 | -2.585 |
|  | I tried to keep my feelings under control | 2.283 | 4.72 | 3.593 | 2.69 | 1.193 | -0.674 | -2.893 |
|  | I tried to get in touch with my feelings to identify and work on problems | - |  |  |  |  |  |  |
|  | I remained calm even on the most trying days | 2.942 | 5.919 | 4.997 | 3.76 | 1.734 | -0.604 | -3.507 |
|  |  |  |  |  |  |  |  |  |
|  | *Humour* |  |  |  |  |  |  |  |
|  | I laughed about the situation | 2.839 | 3.825 | 2.506 | 1.469 | -0.281 | -2.021 | -4.299 |
|  | I tried to see the humorous side of the situation | 4.124 | 5.088 | 3.869 | 2.759 | 0.318 | -2.157 | -5.483 |
|  | My sense of humor made it easier to deal with tough situations | 3.672 | 5.406 | 4.365 | 3.051 | 0.666 | -1.459 | -4.418 |
|  | I tried to keep a sense of humor | 2.863 | 5.258 | 4.226 | 3.283 | 1.196 | -0.674 | -3.513 |
|  |  |  |  |  |  |  |  |  |
|  | *Meaning making* |  |  |  |  |  |  |  |
|  | I found meaning from the experience | 3.846 | 6.138 | 4.737 | 3.6 | 0.804 | -1.155 | -4.396 |
|  | I learned something from the experience | 2.856 | 5.577 | 4.527 | 3.402 | 1.322 | -0.687 | -3.187 |
|  | I looked for something good in what was happening | 3.427 | 6.501 | 4.895 | 3.526 | 1.236 | -1.122 | -4.077 |
|  | I found meaning in hardships that came my way | 3.24 | 5.439 | 3.956 | 2.948 | 0.598 | -1.416 | -3.984 |
|  |  |  |  |  |  |  |  |  |
|  | *Support* |  |  |  |  |  |  |  |
|  | I talked to someone about how I felt | 3.015 | 4.633 | 3.258 | 2.209 | 0.672 | -1.173 | -3.685 |
|  | I shared my worries with someone | - |  |  |  |  |  |  |
|  | I turned to others for help | 3.692 | 5.331 | 3.484 | 2.133 | -0.015 | -2.016 | -4.778 |
|  | I talked the problem over with people who had been in a similar situation | 3.026 | 4.006 | 2.749 | 1.72 | -0.085 | -1.707 | -4.373 |
|  |  |  |  |  |  |  |  |  |
| **Engagement** | |  |  |  |  |  |  |  |
|  | I was absorbed in what I was doing | 3.279 | 7.254 | 5.697 | 4.059 | 1.638 | -0.685 | -4.038 |
|  | I often lost track of time while doing something I enjoy | 1.668 | 4.125 | 3.051 | 2.21 | 1.072 | -0.365 | -2.273 |
|  | Whether at work or play, I was usually ‘‘in a zone’’ and not conscious of myself | 1.27 | 3.308 | 2.22 | 1.376 | -0.024 | -1.257 | -2.971 |
|  | I had the ability to enjoy the moment | 1.872 | 5.155 | 3.921 | 2.865 | 1.472 | -0.222 | -2.458 |
|  |  |  |  |  |  |  |  |  |
| **Happiness** | |  |  |  |  |  |  |  |
|  | I often felt happy | 6.016 | 10.590 | 7.009 | 4.766 | 2.067 | -1.241 | -5.589 |
|  | I was often in a good mood, even without a specific reason | 5.307 | 9.507 | 6.066 | 4.008 | 1.597 | -1.487 | -5.47 |
|  | I was a cheerful person | 4.836 | 8.336 | 5.917 | 3.932 | 1.625 | -1.062 | -4.683 |
|  | I often experienced positive feelings in my life | 4.600 | 8.413 | 5.821 | 3.907 | 1.594 | -0.821 | -4.693 |
|  |  |  |  |  |  |  |  |  |
| **Life Satisfaction** | |  |  |  |  |  |  |  |
|  | I often felt satisfied with life | - |  |  |  |  |  |  |
|  | I felt that if I could live my life over, I would change almost nothing | 2.649 | 2.842 | 1.592 | 0.284 | -0.911 | -2.112 | -4.21 |
|  | In most ways my life was close to my ideal | 7.271 | 8.595 | 4.768 | 2.001 | -1.055 | -4.397 | -9.856 |
|  | I was content with my life | 3.788 | 0.377 | 0.276 | 0.212 | 0.176 | 0.189 | 0.299 |
|  |  |  |  |  |  |  |  |  |
| **Meaning and Purpose** | |  |  |  |  |  |  |  |
|  | I had a sense of direction | - |  |  |  |  |  |  |
|  | I had a good sense of where I am headed in my life | - |  |  |  |  |  |  |
|  | I was clear about what I want in life | - |  |  |  |  |  |  |
|  | I believed I knew what I was meant to do in life | 4.15 | 6.315 | 4.249 | 2.661 | 0.37 | -1.722 | -4.852 |
|  | I understood my life’s meaning | - |  |  |  |  |  |  |
|  | My life had a clear sense of purpose | 4.847 | 7.726 | 5.382 | 3.485 | 0.868 | -1.284 | -5.371 |
|  | I found meaning in my life experiences | 4.099 | 7.127 | 5.168 | 3.52 | 1.206 | -1.132 | -4.455 |
|  | I felt my life had value and worth | - |  |  |  |  |  |  |
|  |  |  |  |  |  |  |  |  |
| **Optimism** | |  |  |  |  |  |  |  |
|  | *Future* |  |  |  |  |  |  |  |
|  | I felt optimistic about the future | 2.893 | 4.905 | 3.337 | 2.22 | 0.634 | -1.225 | -3.628 |
|  | I expected my future life will be ideal for me | 17.74 | 25.847 | 17.801 | 12.471 | 1.99 | -6.716 | -19.728 |
|  | I felt good about my future | - |  |  |  |  |  |  |
|  | I felt that the future looks hopeful and promising | - |  |  |  |  |  |  |
|  |  |  |  |  |  |  |  |  |
|  | *Outlook* |  |  |  |  |  |  |  |
|  | I had a positive outlook toward life | - |  |  |  |  |  |  |
|  | I usually expected the best, even in uncertain times | 3.283 | 5.493 | 3.822 | 2.394 | 0.543 | -1.391 | -4.271 |
|  | I looked forward to each new day | 4.342 | 7.41 | 5.347 | 3.733 | 1.328 | -0.874 | -4.373 |
|  | I felt that life is full of opportunities | 3.625 | 6.543 | 4.801 | 3.51 | 1.515 | -0.664 | -3.566 |
|  |  |  |  |  |  |  |  |  |
| **Personal Circumstances** | |  |  |  |  |  |  |  |
|  | I had enough money to meet my needs | 2.481 | 3.16 | 2.069 | 1.272 | 0.365 | -0.894 | -3.166 |
|  | I was satisfied with my living conditions | 3.590 | 5.846 | 4.243 | 2.896 | 1.487 | -0.529 | -3.811 |
|  | I often felt overwhelmed by my responsibilities |  |  |  |  |  |  |  |
|  | I was satisfied with my standard of living | 6.593 | 8.686 | 6.113 | 3.982 | 1.652 | -1.242 | -5.905 |
|  |  |  |  |  |  |  |  |  |
| **Personal relationships** | |  |  |  |  |  |  |  |
|  | *Friendship* |  |  |  |  |  |  |  |
|  | I often felt close to people | 2.625 | 5.923 | 4.26 | 2.629 | 0.868 | -1.167 | -4.213 |
|  | I felt that I belonged with my friends | 2.98 | 6.505 | 4.995 | 3.602 | 1.104 | -0.941 | -4.275 |
|  | I felt very connected to the people around me | 2.657 | 6.011 | 4.411 | 2.994 | 1.044 | -1.268 | -4.267 |
|  | My social relationships were supportive and rewarding | - |  |  |  |  |  |  |
|  | I felt I could make friends easily | 2.05 | 4.506 | 3.268 | 2.188 | 0.621 | -1.023 | -3.573 |
|  | I felt good at keeping friendships going | 2.68 | 6.252 | 4.814 | 3.472 | 1.118 | -0.891 | -3.995 |
|  | I felt emotionally satisfied in my relationships with other people* | - |  |  |  |  |  |  |
|  | I could rely on my friends for help if I needed it | 2.055 | 4.653 | 3.585 | 2.537 | 0.985 | -0.68 | -3.15 |
|  |  |  |  |  |  |  |  |  |
|  | *Feeling valued by others* |  |  |  |  |  |  |  |
|  | I felt a strong emotional bond with at least one other person | 3.09 | 4.606 | 3.918 | 2.868 | 1.557 | 0.117 | -1.93 |
|  | I could be myself around others | 4.128 | 5.789 | 4.77 | 3.72 | 1.938 | -0.209 | -3.257 |
|  | People respected me | 4.19 | 6.062 | 4.636 | 3.735 | 1.457 | -0.698 | -3.762 |
|  | People in my life cared about me | 4.075 | 6.354 | 4.974 | 3.888 | 2.159 | -0.053 | -2.849 |
|  | I got along well with people I came into contact with | 4.022 | 6.361 | 5.474 | 4.386 | 2.294 | -0.013 | -3.098 |
|  | I got along well with others | 5.161 | 7.862 | 6.612 | 5.5 | 2.676 | 0.232 | -3.947 |
|  |  |  |  |  |  |  |  |  |
|  | *Giving support* |  |  |  |  |  |  |  |
|  | I felt I am someone people can generally rely on in an emergency | 3.178 | 5.716 | 4.884 | 4.009 | 2.284 | 0.374 | -2.631 |
|  | My friends knew they could count on me | 3.475 | 5.979 | 5.154 | 4.333 | 2.271 | 0.257 | -2.808 |
|  | I made an effort to help others | 2.379 | 5.277 | 4.455 | 3.529 | 1.849 | 0.105 | -2.247 |
|  |  |  |  |  |  |  |  |  |
|  | *Having close relationships* |  |  |  |  |  |  |  |
|  | I felt members of my family could come to me for support | 2.885 | 4.475 | 3.461 | 2.691 | 1.263 | -0.199 | -2.428 |
|  | I was satisfied with my personal relationships | 3.806 | 5.439 | 4.243 | 2.954 | 1.374 | -0.578 | -3.722 |
|  | My close relationships (family and friends) were satisfying | 4.662 | 6.684 | 5.291 | 3.732 | 1.835 | -0.572 | -3.78 |
|  | I was happy with my family relationships | 3.352 | 4.632 | 3.637 | 2.684 | 1.248 | -0.327 | -3.037 |
|  | I felt there was at least one person I know whose advice I really trust | 3.327 | 5.192 | 4.295 | 3.257 | 1.612 | 0.026 | -2.715 |
|  | I had someone I could count on to listen to me when I needed to talk | 3.874 | 5.417 | 4.03 | 3.243 | 1.649 | -0.264 | -3.231 |
|  | I felt I had someone who understands my problems | 3.534 | 4.914 | 3.811 | 2.702 | 1.264 | -0.461 | -3.325 |
|  |  |  |  |  |  |  |  |  |
| **Physical health** | |  |  |  |  |  |  |  |
|  | *General health status* |  |  |  |  |  |  |  |
|  | I was satisfied with my physical health | 4.862 | 7.04 | 4.175 | 2.444 | 0.269 | -1.953 | -5.96 |
|  | I did not have many physical complaints | 2.759 | 4.465 | 2.894 | 1.488 | 0.163 | -1.349 | -3.849 |
|  | My physical health was excellent | 4.304 | 5.636 | 3.398 | 1.578 | -0.333 | -2.576 | -5.805 |
|  | I was basically a healthy person | - |  |  |  |  |  |  |
|  |  |  |  |  |  |  |  |  |
|  | *Restriction 1* |  |  |  |  |  |  |  |
|  | I felt healthy enough to carry out things I like to do | 12.838 | 20.331 | 16.048 | 11.299 | 5.723 | -1.618 | -11.99 |
|  | My physical health problems (if any) stood in the way of doing things I want to do | 2.319 | 4.258 | 3.155 | 2.037 | 0.884 | -0.544 | -2.874 |
|  |  |  |  |  |  |  |  |  |
|  | *Restriction 2* |  |  |  |  |  |  |  |
|  | Health problems did not stop me carrying out my usual tasks | 11.886 | 12.307 | 5.403 | 1.669 | -2.802 | -8.514 | -15.704 |
|  | My health affected my role in my community (e.g. residential, sporting, church or cultural activities) | 1.725 | 2.512 | 1.133 | 0.405 | -0.978 | -1.972 | -3.312 |
|  |  |  |  |  |  |  |  |  |
| **Problem-focused** | |  |  |  |  |  |  |  |
|  | Analysis |  |  |  |  |  |  |  |
|  | I thought of different ways to deal with the problem | 2.17 | 4.782 | 3.962 | 3.351 | 1.282 | -0.544 | -3.115 |
|  | I tried to find out more information to help make a decision about things | 2.495 | 5.377 | 4.249 | 2.977 | 0.899 | -1.164 | -3.674 |
|  | I thought my problems through in a systematic way | 2.989 | 6.463 | 4.881 | 3.53 | 1.487 | -0.914 | -3.921 |
|  |  |  |  |  |  |  |  |  |
|  | Timing |  |  |  |  |  |  |  |
|  | I analysed my problem before reacting (was item 4 Analysis) | - |  |  |  |  |  |  |
|  | I took some time off to get away from the situation | - |  |  |  |  |  |  |
|  | I held off doing anything about it until the situation permits | 1.957 | 4.339 | 3.336 | 2.553 | 0.543 | -1.147 | -3.258 |
|  | I made sure not to make matters worse by acting too soon | 2.882 | 6.095 | 4.886 | 3.602 | 1.315 | -0.835 | -3.86 |
|  | I restrained myself from doing anything too quickly | 2.992 | 6.439 | 5.007 | 3.707 | 1.388 | -1.184 | -3.996 |
|  |  |  |  |  |  |  |  |  |
| **Self-acceptance** | |  |  |  |  |  |  |  |
|  | *Body image* |  |  |  |  |  |  |  |
|  | I was satisfied with the way my body looked | 44.829 | 46.575 | 29.201 | 13.742 | -2.973 | -23.469 | -52.378 |
|  | I was satisfied with what I saw when I look in the mirror | - |  |  |  |  |  |  |
|  | I was satisfied with my overall attractiveness | 2.954 | 3.906 | 2.666 | 1.534 | -0.059 | -1.729 | -4.062 |
|  | I felt comfortable in my body | - |  |  |  |  |  |  |
|  |  |  |  |  |  |  |  |  |
|  | *Other perception* |  |  |  |  |  |  |  |
|  | I felt that most people I know think highly of me | 3.977 | 7.072 | 4.987 | 3.59 | 0.938 | -1.557 | -5.451 |
|  | I felt people I know would tell me I am good at what I do | - |  |  |  |  |  |  |
|  | People liked me | 3.058 | 6.089 | 4.82 | 3.491 | 1.163 | -0.849 | -3.651 |
|  | People accepted me for who I really am | 3.355 | 6.816 | 5.106 | 3.736 | 1.422 | -0.53 | -3.392 |
|  |  |  |  |  |  |  |  |  |
|  | *Self-worth* |  |  |  |  |  |  |  |
|  | I believed in myself | 2.955 | 5.581 | 4.084 | 3.097 | 1.596 | -0.302 | -2.937 |
|  | I felt that I had many positive qualities | 26.383 | 45.524 | 34.117 | 26.46 | 13.019 | -2.367 | -24.517 |
|  | I liked who I am | - |  |  |  |  |  |  |
|  | I felt worthy | - |  |  |  |  |  |  |
|  |  |  |  |  |  |  |  |  |
| **Sense of community** | |  |  |  |  |  |  |  |
|  | *Community belonging and Contribution* |  |  |  |  |  |  |  |
|  | I felt that I belonged to a community (like a social group, or neighbourhood) | - |  |  |  |  |  |  |
|  | I felt like part of a group of people who share my attitudes and beliefs | 2.869 | 4.386 | 3.106 | 1.844 | -0.16 | -1.601 | -4.024 |
|  | I felt like I am an important part of my community | 3.579 | 4.932 | 2.968 | 1.563 | -0.666 | -2.537 | -5.351 |
|  | I felt close to other people in my community | 4.014 | 5.718 | 3.663 | 2.177 | -0.225 | -2.598 | -6.038 |
|  | I felt like helping others | 1.813 | 4.477 | 3.668 | 2.862 | 1.399 | -0.326 | -2.384 |
|  | I tried to make a meaningful contribution to society | 2.718 | 4.726 | 3.318 | 2.491 | 0.511 | -1.398 | -3.771 |
|  | I felt that what I do matters to society | 3.33 | 5.18 | 3.352 | 2.055 | -0.033 | -1.857 | -4.509 |
|  | I participated in community activities | 2.501 | 3.167 | 1.605 | 0.669 | -0.772 | -2.094 | -4.271 |
|  |  |  |  |  |  |  |  |  |
|  | *Views on society* |  |  |  |  |  |  |  |
|  | I felt that our society is a good place, or is becoming a better place, for all people | 5.138 | 5.402 | 3.242 | 1.377 | -1.506 | -4.25 | -8.295 |
|  | I felt that the way our society works makes sense to me | 2.902 | 3.439 | 2.187 | 1.004 | -0.796 | -2.752 | -5.184 |
|  | I thought our society is a productive place for people to live in | 2.857 | 4.388 | 2.858 | 1.779 | -0.113 | -2.002 | -4.882 |
|  | I thought the world is becoming a better place for everyone | 3.415 | 3.706 | 1.756 | 0.228 | -1.658 | -3.496 | -5.751 |
|  |  |  |  |  |  |  |  |  |
|  | *Views on people* |  |  |  |  |  |  |  |
|  | I felt that people are basically good | 3.509 | 6.413 | 4.726 | 3.263 | 0.922 | -1.637 | -5.083 |
|  | I believed that people are kind | 3.751 | 6.771 | 5.524 | 3.777 | 1.015 | -1.809 | -5.584 |
|  | I thought that people care about other people's problems | - |  |  |  |  |  |  |
|  | Most of the people I met were likeable | 2.101 | 5.173 | 4.103 | 3.235 | 1.311 | -0.603 | -3.265 |
|  |  |  |  |  |  |  |  |  |
| **Self-congruence** | |  |  |  |  |  |  |  |
|  | Most of my time was spent doing things that are meaningful | 1.782 | 4.164 | 2.876 | 1.855 | 0.587 | -0.723 | -2.543 |
|  | I felt that my choices were based on my true interests and values |  |  |  |  |  |  |  |
|  | I was really doing what interests me |  |  |  |  |  |  |  |
|  | I felt my behavior was congruent with my values | 10.580 | 11.869 | 8.792 | 6.832 | 2.223 | 0.98 | 6.329 |
|  |  |  |  |  |  |  |  |  |
| **Spirituality** | |  |  |  |  |  |  |  |
|  | *Environment* |  |  |  |  |  |  |  |
|  | I felt a strong sense of connection when in nature | 3.374 | 6.094 | 4.856 | 3.573 | 1.243 | -0.808 | -3.618 |
|  | I developed harmony with the environment | 3.568 | 5.803 | 4.585 | 3.474 | 0.497 | -1.574 | -4.614 |
|  | I lived in harmony with nature | 3.722 | 6.059 | 5.277 | 4.108 | 0.905 | -1.317 | -4.461 |
|  | I felt appreciation for the beauty of nature | 2.789 | 5.864 | 5.017 | 3.971 | 2.04 | 0.112 | -2.247 |
|  |  |  |  |  |  |  |  |  |
|  | *God relationship, Impact of religion* |  |  |  |  |  |  |  |
|  | I put my trust in God | 4.864 | 3.901 | 2.73 | 1.981 | -0.064 | -1.699 | -3.525 |
|  | I believed there is a higher being who looks after me | - |  |  |  |  |  |  |
|  | I gained spiritual strength by trusting in a higher power | - |  |  |  |  |  |  |
|  | I felt I had a relationship with a higher power/ universal intelligence | 4.074 | 4.074 | 4.134 | 2.541 | 1.491 | -0.511 | -1.971 |
|  | My spiritual beliefs helped me to deal with adversity in life | - |  |  |  |  |  |  |
|  | My spiritual beliefs gave meaning to my life | - |  |  |  |  |  |  |
|  | I found comfort in my religion or spiritual beliefs | - |  |  |  |  |  |  |
|  | My religious beliefs influenced the way I live | 5.097 | 5.097 | 4.011 | 2.517 | 1.447 | -0.749 | -2.428 |
|  | I trusted that everything happens as it should | - |  |  |  |  |  |  |
|  | I felt there is a spiritual purpose for my life | 3.763 | 3.763 | 4.084 | 2.696 | 1.804 | 0.062 | -1.656 |
|  | I felt my life is guided by strong religious or ethical beliefs | 5.154 | 5.154 | 4.137 | 2.963 | 1.755 | -0.743 | -2.667 |
|  | I was satisfied with my spiritual life | - |  |  |  |  |  |  |
|  |  |  |  |  |  |  |  |  |
| **Vitality** | |  |  |  |  |  |  |  |
|  | I had enough energy to do what I had to do |  |  |  |  |  |  |  |
|  | I could continuously work for a long time without feeling tired | 12.472 | 19.154 | 13.841 | 8.641 | 4.732 | -2.444 | -12.975 |
|  | I had the energy to accomplish my daily tasks |  |  |  |  |  |  |  |
|  | I had enough energy for everyday life | 2.341 | 3.622 | 2.222 | 0.942 | -0.035 | -1.505 | -3.598 |
|  |  |  |  |  |  |  |  |  |
|  |  |  |  |  |  |  |  |  |
|  |  |  |  |  |  |  |  |  |
|  |  |  |  |  |  |  |  |  |
| **Undefined** | |  |  |  |  |  |  |  |
|  | *Control over life* |  |  |  |  |  |  |  |
|  | I tried to take life as it comes | 2.192 | 5.567 | 4.525 | 3.729 | 2.243 | 0.24 | -2.519 |
|  | I did not dwell on things that I could not do anything about | 2.125 | 4 | 2.622 | 1.635 | 0.479 | -1.081 | -3.209 |
|  | I felt I could make major changes in my life when I needed to | 2.24 | 4.496 | 3.314 | 2.108 | 0.747 | -1.061 | -3.509 |
|  | I accepted I cannot change everything | 1.824 | 4.984 | 3.821 | 2.89 | 1.64 | 0.099 | -1.958 |
|  |  |  |  |  |  |  |  |  |
|  | *Achievement* |  |  |  |  |  |  |  |
|  | Most days I felt a sense of accomplishment from what I do | - |  |  |  |  |  |  |
|  | I felt proud that I have accomplished things in life | - |  |  |  |  |  |  |
|  | I felt my life has been productive | 2.293 | 4.558 | 3.289 | 2.256 | 0.956 | -0.615 | -2.99 |
|  | I was satisfied with the achievement of my personal goals | 16.258 | 25.691 | 17.907 | 12.031 | 3.422 | -5.138 | -19.433 |
|  |  |  |  |  |  |  |  |  |
|  | *Fun* |  |  |  |  |  |  |  |
|  | I liked to kid around with others | 1.863 | 4.692 | 4.011 | 3.141 | 1.406 | -0.308 | -2.418 |
|  | I often found that the small things in everyday life are really funny and amusing | 2.184 | 5.198 | 3.882 | 2.688 | 1.136 | -0.561 | -2.998 |
|  | I often smiled | 3.392 | 6.286 | 4.875 | 3.448 | 1.672 | -0.38 | -3.5 |
|  | I laughed easily | 3.975 | 8.028 | 6.049 | 4.367 | 2.001 | -0.723 | -4.212 |
|  |  |  |  |  |  |  |  |  |
|  | *Novelty / Open mindedness* |  |  |  |  |  |  |  |
|  | I got involved in new activities | 3.151 | 5.222 | 3.325 | 1.683 | -0.396 | -2.093 | -4.752 |
|  | I was more curious than most people | 1.748 | 4.584 | 3.108 | 2.138 | 0.434 | -0.972 | -2.859 |
|  | I kept interested in things | 1.591 | 4.421 | 3.161 | 2.383 | 1.21 | -0.346 | -2.372 |
|  | I chose to do things that I have never done before | 2.682 | 0.267 | 0.192 | 0.153 | 0.134 | 0.159 | 0.266 |
|  |  |  |  |  |  |  |  |  |
|  | *Accepting others* |  |  |  |  |  |  |  |
|  | I was interested in understanding the views of others | 2.921 | 6.862 | 5.539 | 4.349 | 1.898 | -0.476 | -3.668 |
|  | I thought about ideas different than my own | 2.053 | 5.128 | 3.813 | 2.832 | 0.864 | -0.845 | -3.441 |
|  | I was able to appreciate differences in others | 2.791 | 6.929 | 5.668 | 4.454 | 1.988 | -0.246 | -3.251 |
|  | I tried to see things from the other person’s point of view | 2.766 | 6.648 | 5.269 | 4.179 | 2.22 | -0.259 | -3.16 |
|  |  |  |  |  |  |  |  |  |

**References:**

American Psychological Association. (2022a). Avoidance Coping. In *APA Dictionary of Psychology*. <https://dictionary.apa.org/avoidance-coping>

American Psychological Association. (2022b). Emotion-focused Coping. In *APA Dictionary of Psychology*. <https://dictionary.apa.org/emotion-focused-coping>

American Psychological Association. (2022c). Problem-focused Coping. In *APA Dictionary of Psychology*. <https://dictionary.apa.org/problem-focused-coping>

Keyes, C. L. M. (1998). Social Well-Being. *Social Psychology Quarterly*, *61*(2), 121-140. <https://doi.org/10.2307/2787065>

Linton, M.-J., Dieppe, P., & Medina-Lara, A. (2016). Review of 99 self-report measures for assessing well-being in adults: exploring dimensions of well-being and developments over time. *BMJ open*, *6*(7), e010641. <https://doi.org/https://dx.doi.org/10.1136/bmjopen-2015-010641>

Longo, Y., Coyne, I., & Joseph, S. (2017). The scales of general well-being (SGWB). *Personality and Individual Differences*, *109*, 148-159.

Ryan, R. M., & Deci, E. L. (2000). Self-determination theory and the facilitation of intrinsic motivation, social development, and well-being. *American psychologist*, *55*(1), 68.

Veenhoven, R. (1996). Developments in satisfaction-research. *Social Indicators Research*, *37*(1), 1-46. <https://doi.org/10.1007/BF00300268>
